# Supplementary material for: The novel bronchodilator navafenterol: a phase 2a, multicentre, randomised, double-blind, placebo-controlled crossover trial in COPD
Source: PubMed Central journal article supplement — Eur Respir J. 2022 Apr 7;59(4):2100972. doi: 10.1183/13993003.00972-2021 (PMC8989052; doi:10.1183/13993003.00972-2021), 2022-04-07

**TABLE S1** AUC FEV<sub>1</sub> at day 14 for UMEC/VI versus placebo

| Time period | UMEC/VI versus placebo                              |         |
|-------------|-----------------------------------------------------|---------|
|             | FEV <sub>1</sub> AUC LS mean difference, L (95% CI) | p-value |
| 0–4 h       | 0.314 (0.258 to 0.371)                              | <0.0001 |
| 0–8 h       | 0.309 (0.251 to 0.366)                              | <0.0001 |
| 0–12 h      | 0.295 (0.242 to 0.348)                              | <0.0001 |
| 0–24 h      | 0.274 (0.224 to 0.324)                              | <0.0001 |

AUC: area under the curve; CI: confidence interval; FEV<sub>1</sub>: forced expiratory volume in 1 s;

LS: least-squares; UMEC/VI: umeclidinium/vilanterol.

**TABLE S2** CAT responder analysis for day 1 to day 14

| Navafenterol versus placebo           |         | UMEC/VI versus placebo                |         | Navafenterol versus UMEC/VI           |         |
|---------------------------------------|---------|---------------------------------------|---------|---------------------------------------|---------|
| Proportion of responders by treatment | p-value | Proportion of responders by treatment | p-value | Proportion of responders by treatment | p-value |
| Navafenterol 0.62                     | 0.022   | UMEC/VI 0.67                          | 0.008   | Navafenterol 0.61                     | 0.63    |
| Placebo 0.45                          |         | Placebo 0.44                          |         | UMEC/VI 0.66                          |         |

CAT: COPD assessment tool; UMEC/VI: umeclidinium/vilanterol.

**TABLE S3** Mean frequency of baseline cough (coughs/h) stratified by smoking status

| Time period | Current smoker |      |      | Ex-smoker |      |      |
|-------------|----------------|------|------|-----------|------|------|
|             | N              | Mean | SD   | N         | Mean | SD   |
| 0–24 h      | 26             | 13.8 | 9.9  | 41        | 6.7  | 7.4  |
| 0–12 h      | 26             | 12.7 | 10.6 | 41        | 7.0  | 7.9  |
| 0–4 h       | 27             | 14.0 | 12.0 | 41        | 8.6  | 10.9 |

SD: standard deviation.

**TABLE S4** Cough severity using the visual analogue scale at baseline and day 14

| Treatment              | Day <sup>#</sup> | Cough severity |                |               | Mean ratios day 14/baseline |                |               | Comparison with placebo <sup>¶</sup> |              |         |
|------------------------|------------------|----------------|----------------|---------------|-----------------------------|----------------|---------------|--------------------------------------|--------------|---------|
|                        |                  | n              | Geometric mean | Geometric CV% | n                           | Geometric mean | Geometric CV% | Estimated ratio                      | 95% CI       | p-value |
| Navafenterol<br>(N=70) | Baseline         | 67             | 2.10           | 1.40          |                             |                |               |                                      |              |         |
|                        | Day 14           | 67             | 1.42           | 2.04          | 67                          | 0.71           | 1.10          | 0.83                                 | 0.67 to 1.03 | 0.087   |
| UMEC/VI<br>(N=69)      | Baseline         | 69             | 1.90           | 1.31          |                             |                |               |                                      |              |         |
|                        | Day 14           | 68             | 1.25           | 1.58          | 68                          | 0.66           | 1.14          | 0.76                                 | 0.61 to 0.94 | 0.013   |
| Placebo<br>(N=68)      | Baseline         | 65             | 1.86           | 1.17          |                             |                |               |                                      |              |         |
|                        | Day 14           | 64             | 1.55           | 1.77          | 64                          | 0.89           | 0.75          | –                                    | –            | –       |

CI: confidence interval; CV: coefficient of variation; UMEC/VI: umeclidinium/vilanterol. #: Baseline was measured at day –1; ¶: estimated ratio and 95% CI are transformed back to original scale.

**TABLE S5** Pharmacokinetic parameters for navafenterol and LAS191861

| Parameter                              |                           | Navafenterol |           | LAS191861 |           |
|----------------------------------------|---------------------------|--------------|-----------|-----------|-----------|
|                                        |                           | Day 1        | Day 14    | Day 1     | Day 14    |
| C <sub>max</sub>                       | n                         | 40           | 41        | 41        | 41        |
|                                        | Geometric mean, pg/mL     | 310.4        | 532.9     | 26.64     | 63.29     |
|                                        | Geometric CV%             | 61.30        | 46.58     | 53.33     | 52.12     |
| t <sub>max</sub>                       | n                         | 40           | 41        | 41        | 41        |
|                                        | Median, h                 | 0.99         | 0.98      | 2.00      | 2.00      |
|                                        | Range, h                  | 0.38–2.02    | 0.45–2.05 | 0.98–4.00 | 0.98–4.03 |
| AUC <sub>0–24</sub>                    | n                         | 41           | 41        | 39        | 41        |
|                                        | Geometric mean, h × pg/mL | 1661         | 3996      | 289.5     | 941.7     |
|                                        | Geometric CV%             | 83.60        | 55.66     | 57.83     | 63.11     |
| R <sub>ac</sub> (C <sub>max</sub> )    | n                         | NA           | 40        | NA        | 41        |
|                                        | Geometric mean            | NA           | 1.725     | NA        | 2.377     |
|                                        | Geometric CV%             | NA           | 44.77     | NA        | 40.02     |
| R <sub>ac</sub> (AUC <sub>0–24</sub> ) | n                         | NA           | 41        | NA        | 39        |
|                                        | Geometric mean            | NA           | 2.406     | NA        | 3.443     |
|                                        | Geometric CV%             | NA           | 50.37     | NA        | 47.15     |
| MR <sub>AUC0–24</sub>                  | n                         | NA           | NA        | 41        | 41        |
|                                        | Geometric mean            | NA           | NA        | 0.1522    | 0.2356    |
|                                        | Geometric CV%             | NA           | NA        | 41.66     | 30.33     |

$AUC_{(0-24)}$ : area under the plasma concentration–time curve from time 0 h to 24 h post-dose;  $C_{max}$ : maximum plasma concentration; CV: coefficient of variation;  $MR_{AUC0-24}$ : metabolic ratio of area under the plasma concentration–time curve from time 0 h to 24 h post-dose; NA: not applicable;  $R_{ac(AUC0-24)}$ : accumulation ratio calculated from  $AUC_{0-24}$ ;  $R_{ac(C_{max})}$ : accumulation ratio calculated from  $C_{max}$ ;  $t_{max}$ : time to  $C_{max}$ .

**FIGURE S1** Chemical structure of LAS191861, the primary metabolite of navafenterol (AZD8871).

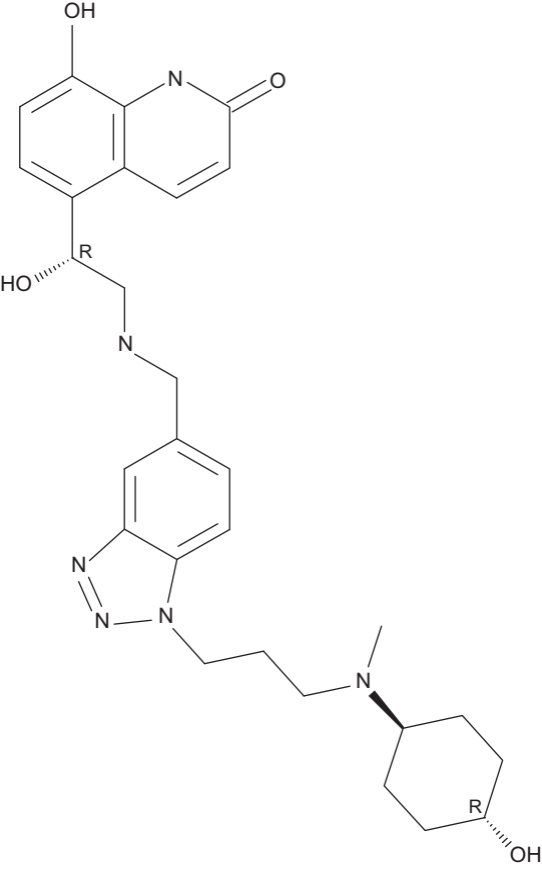

**FIGURE S2** FEV<sub>1</sub> in patients with reversible and non-reversible status at screening. a) LS mean change from baseline in peak FEV<sub>1</sub> at day 14. b) LS mean change from baseline in trough FEV<sub>1</sub> at day 15. FEV<sub>1</sub>: forced expiratory volume in 1 s; LS: least-squares; UMEC/VI: umeclidinium/vilanterol.

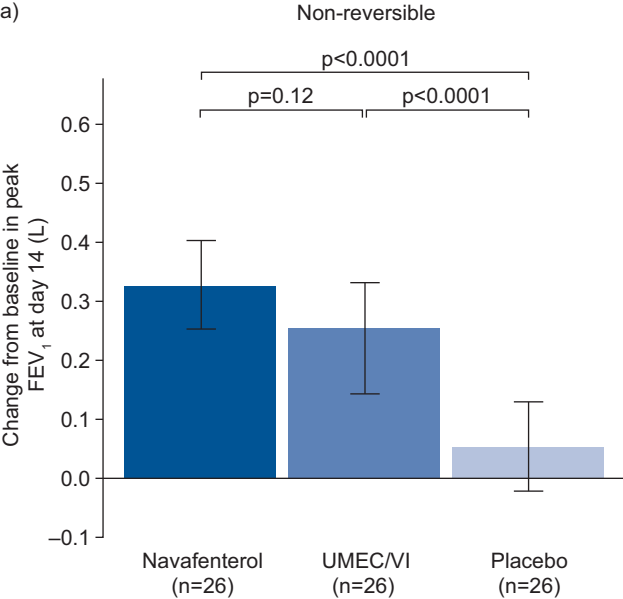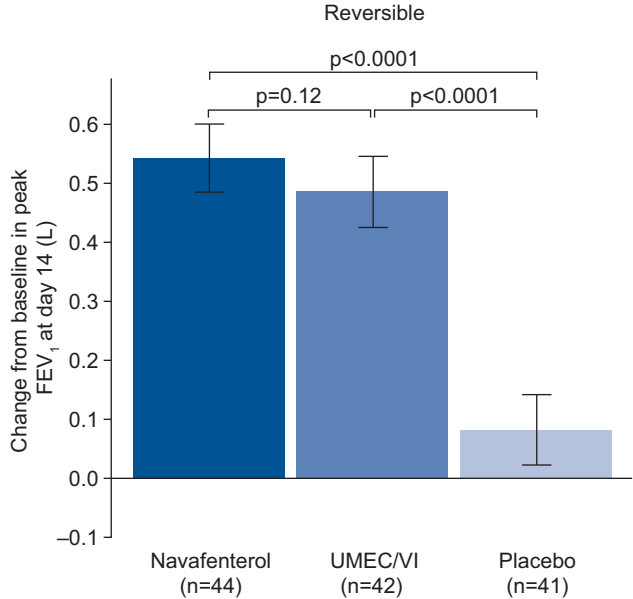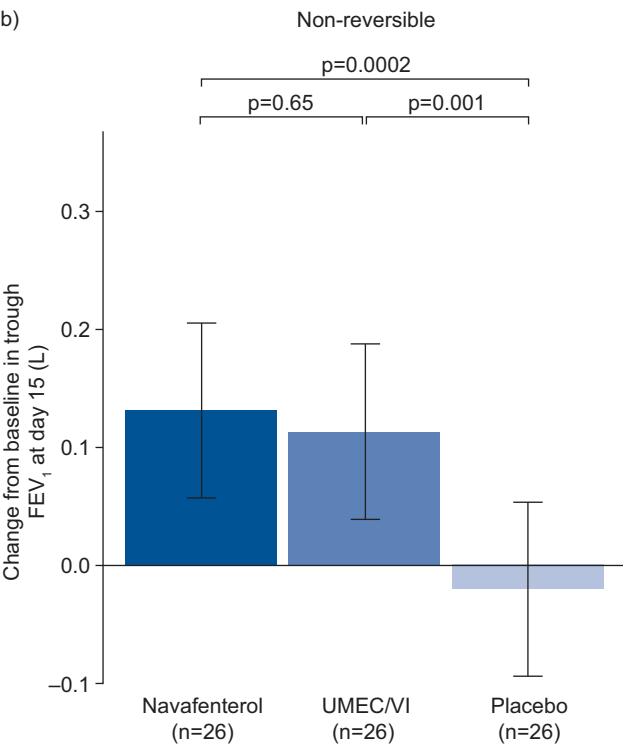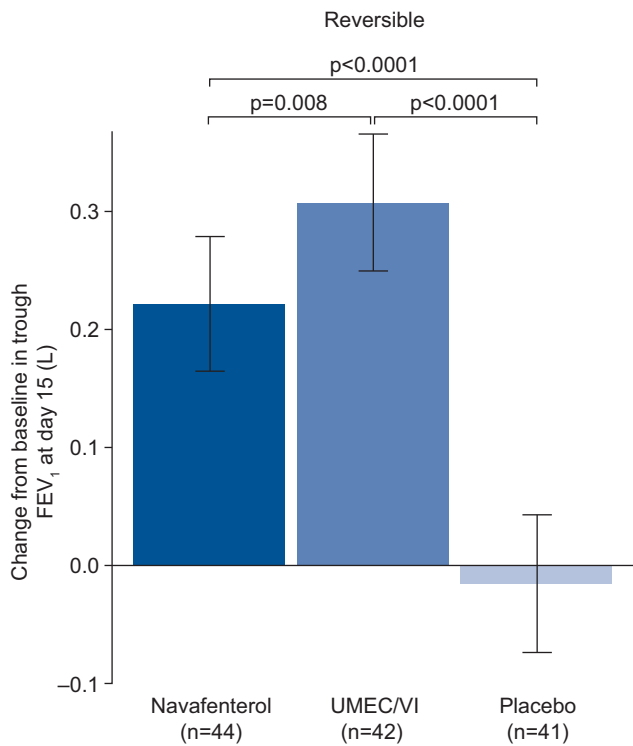



**FIGURE S3** Subgroup analysis of low ( $<150 \times 10^6/L$ ) and high ( $\geq 150 \times 10^6/L$ ) eosinophil count.

a) LS mean change from baseline in trough FEV<sub>1</sub> at day 15. b) LS mean change from baseline in peak FEV<sub>1</sub> at day 14. CI: confidence interval; eos: eosinophil count; FEV<sub>1</sub>: forced expiratory volume in 1 s; LS: least-squares; UMEC/VI: umeclidinium/vilanterol.

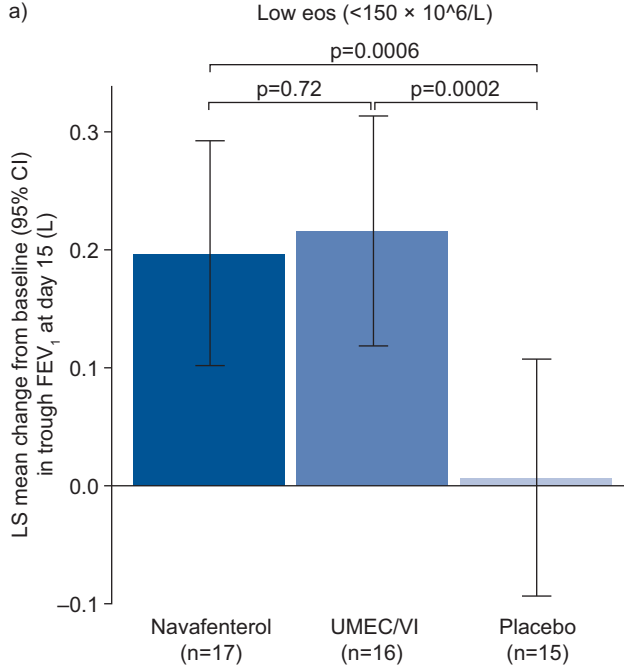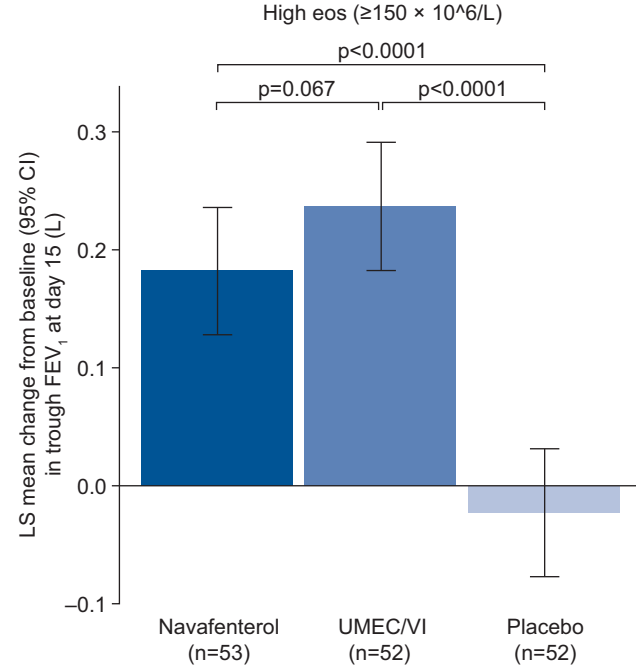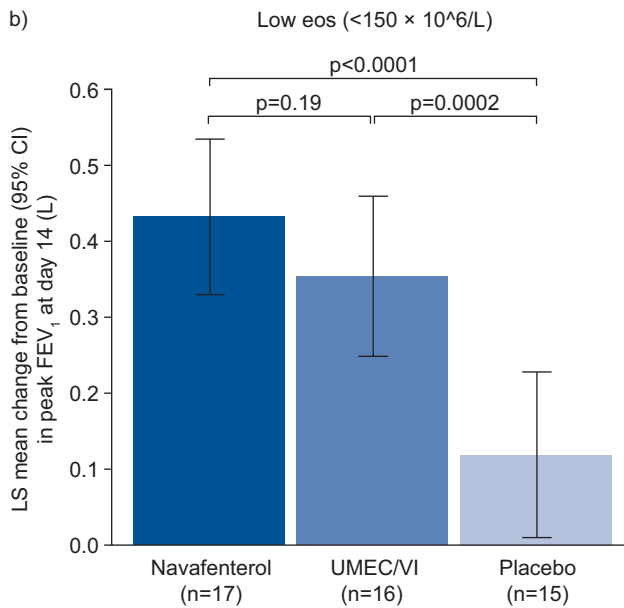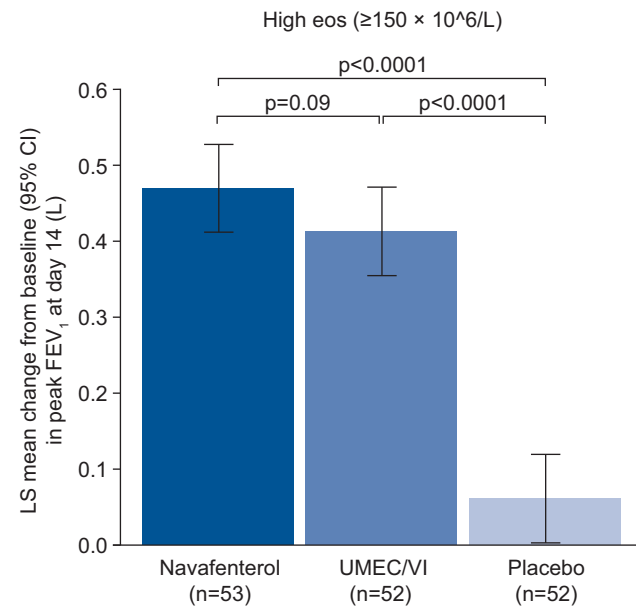

**FIGURE S4** Subgroup analysis of patients receiving and not receiving ICS. a) LS mean change from baseline in trough FEV<sub>1</sub> at day 15. b) LS mean change from baseline in peak FEV<sub>1</sub> at day 14. CI: confidence interval; FEV<sub>1</sub>: forced expiratory volume in 1 s; ICS: inhaled corticosteroid; LS: least-squares; UMEC/VI: umeclidinium/vilanterol.

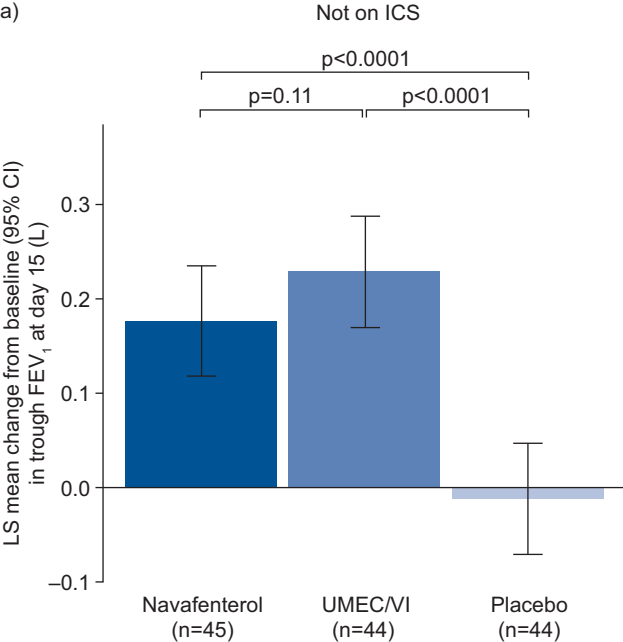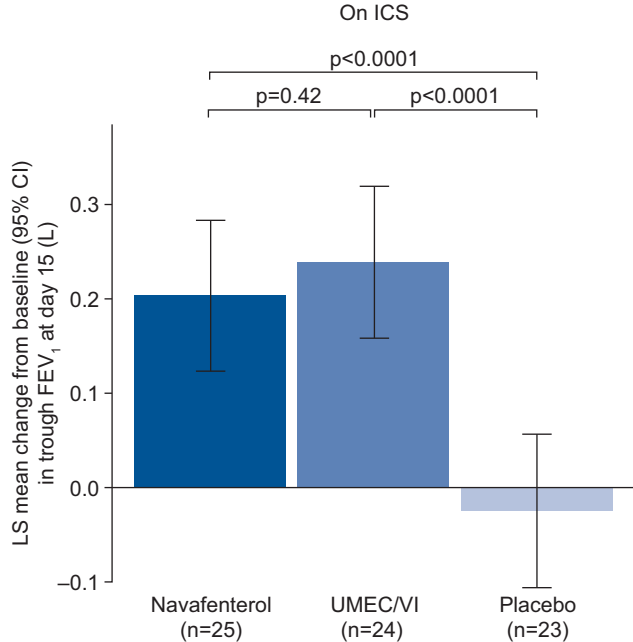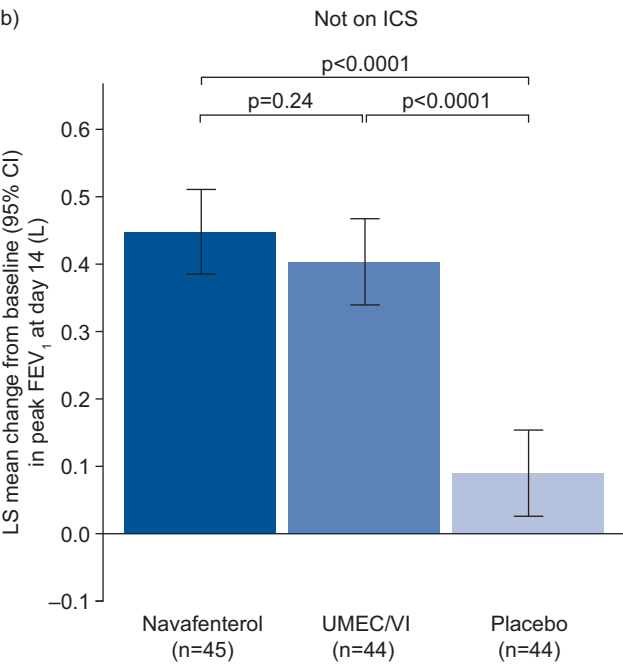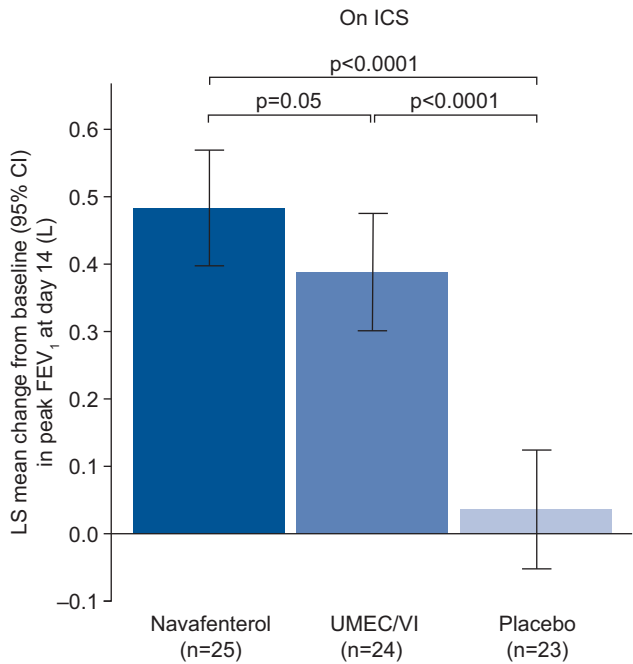

**FIGURE S5** Subgroup analysis of current and former smokers. a) LS mean change from baseline in trough FEV<sub>1</sub> at day 15. b) LS mean change from baseline in peak FEV<sub>1</sub> at day 14. CI: confidence interval; FEV<sub>1</sub>: forced expiratory volume in 1 s; LS: least-squares; UMEC/VI: umeclidinium/vilanterol.

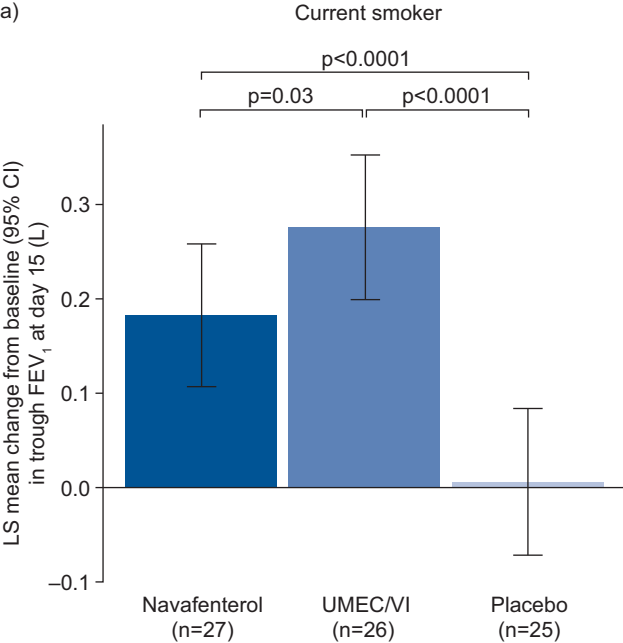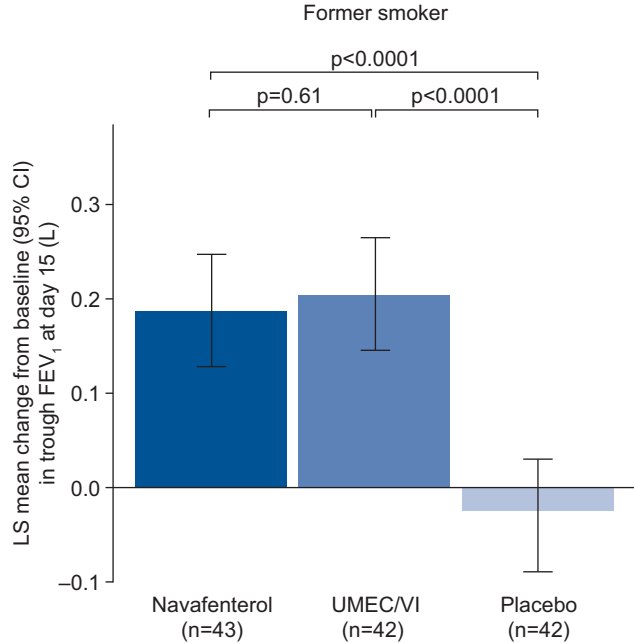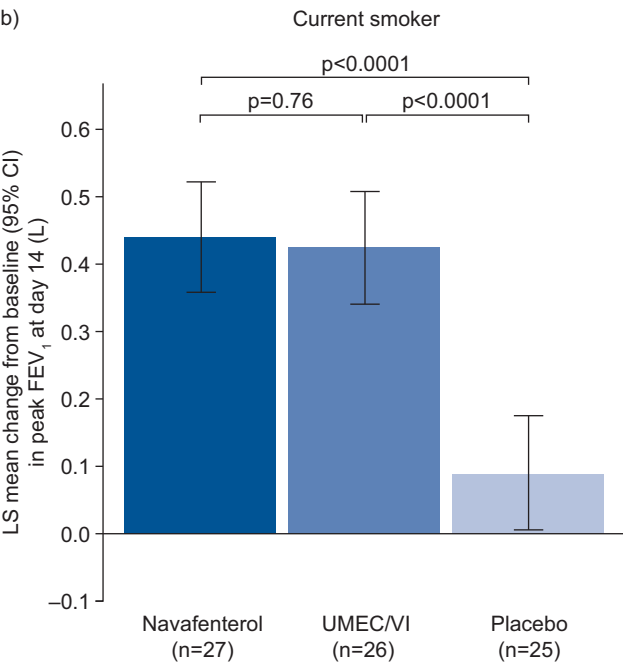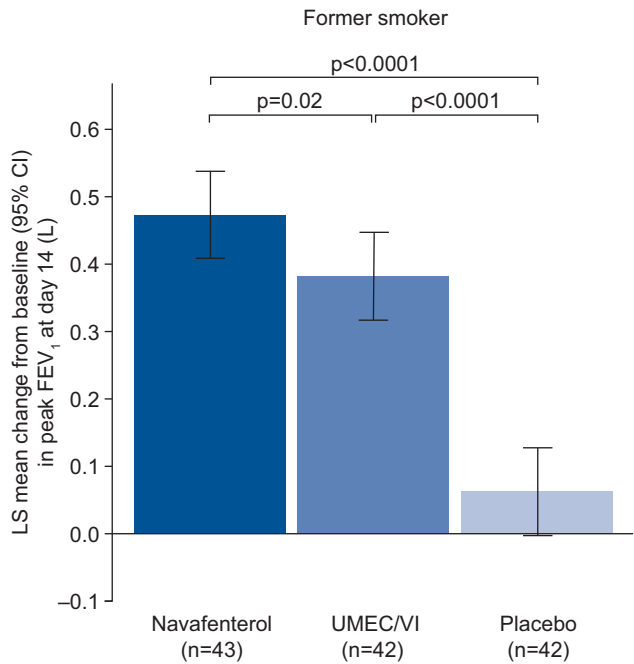

**FIGURE S6** LS mean change from baseline in number of puffs of rescue medication per day from days 1–8 and 9–14. CI: confidence interval; LS: least-squares; UMEC/VI: umeclidinium/vilanterol.

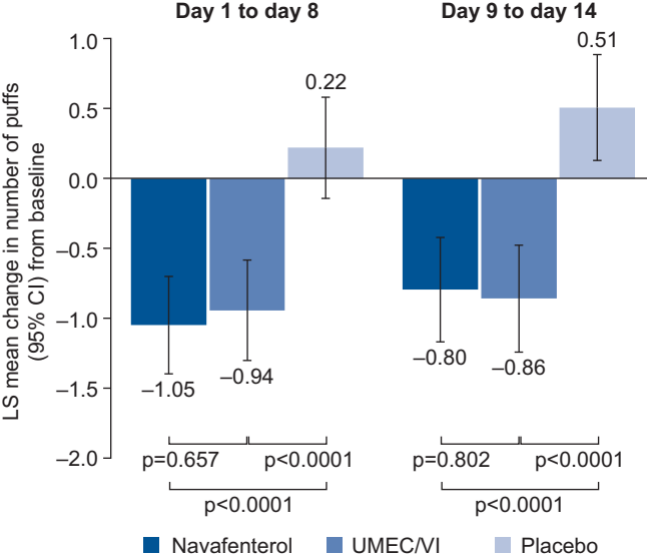



**FIGURE S7** Geometric mean plasma concentration–time profiles for a) navafenterol and b) LAS191861. Error bars represent geometric standard deviation.

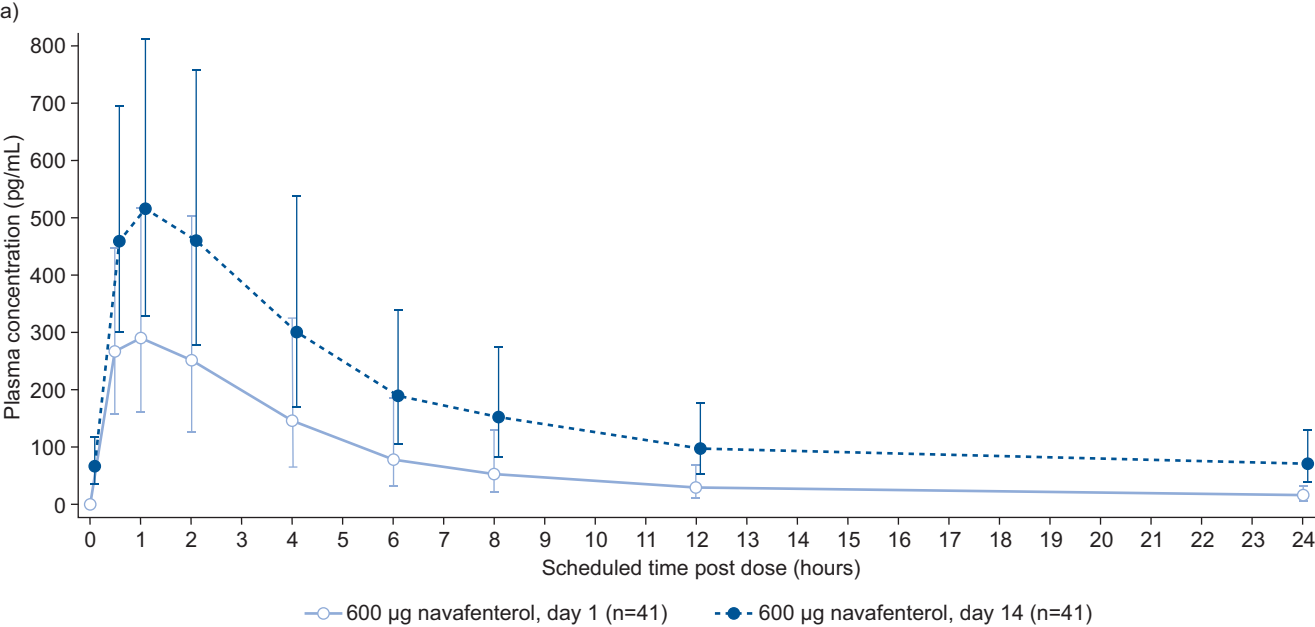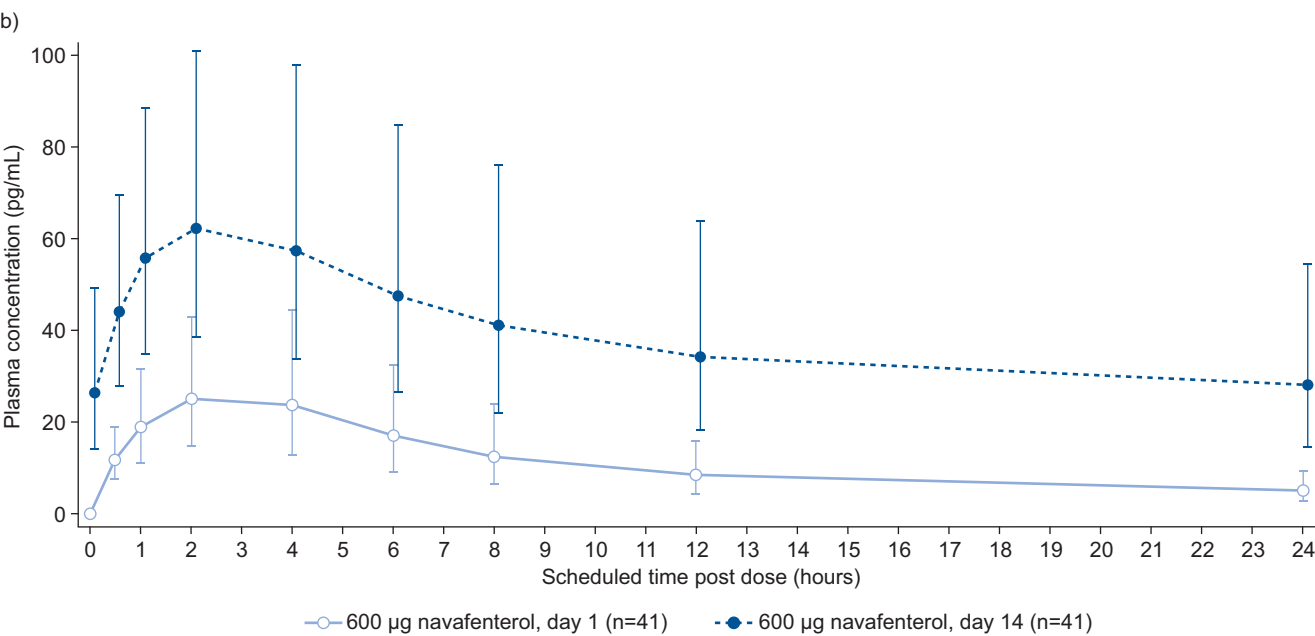

Supplement: ERJ-00972-2021.Tables.pdf [file ERJ-00972-2021.Tables.pdf]
