# Supplementary material for: The novel bronchodilator navafenterol: a phase 2a, multicentre, randomised, double-blind, placebo-controlled crossover trial in COPD
Source: PubMed Central journal article supplement — Eur Respir J. 2022 Apr 7;59(4):2100972. doi: 10.1183/13993003.00972-2021 (PMC8989052; doi:10.1183/13993003.00972-2021), 2022-04-07
Supplement: ERJ-00972-2021.Shareable.pdf [file ERJ-00972-2021.Shareable.pdf]

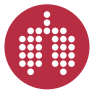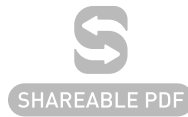

# The novel bronchodilator navafenterol: a phase 2a, multicentre, randomised, double-blind, placebo-controlled crossover trial in COPD

Dave Singh<sup>1,2</sup>, Jutta Beier<sup>3</sup>, Carol Astbury<sup>4</sup>, Maria G. Belvisi<sup>5,6</sup>, Carla A. Da Silva<sup>5</sup>, Alexandra Jauhiainen<sup>7</sup>, Eulalia Jimenez<sup>8</sup>, Alejandra Lei<sup>9</sup>, Sofia Necander<sup>5</sup>, Jaclyn A. Smith <sup>2</sup>, Ulrika Wählby Hamrén<sup>10</sup>, Wenjing Xin<sup>7</sup> and Ioannis Psallidas<sup>4</sup>

<sup>1</sup>Medicines Evaluation Unit, Manchester University NHS Foundation Trust, Manchester, UK. <sup>2</sup>Division of Infection, Immunity and Respiratory Medicine, University of Manchester and Manchester University NHS Foundation Trust, Manchester, UK. <sup>3</sup>insaf Respiratory Research Institute Wiesbaden, Wiesbaden, Germany. <sup>4</sup>Research and Early Development, Respiratory & Immunology, BioPharmaceuticals R&D, AstraZeneca, Cambridge, UK. <sup>5</sup>Research and Early Development, Respiratory & Immunology, BioPharmaceuticals R&D, AstraZeneca, Gothenburg, Sweden. <sup>6</sup>Respiratory Pharmacology Group, Airway Disease, National Heart and Lung Institute, Imperial College London, London, UK. <sup>7</sup>BioPharma Early Biometrics and Statistical Innovation, Data Science & AI, BioPharmaceuticals R&D, AstraZeneca, Gothenburg, Sweden. <sup>8</sup>Clinical Pharmacology and Quantitative Pharmacology, Clinical Pharmacology and Safety Sciences, R&D, AstraZeneca, Barcelona, Spain. <sup>9</sup>Patient Safety BioPharma, Chief Medical Office, R&D, AstraZeneca, Barcelona, Spain. <sup>10</sup>Clinical Pharmacology and Quantitative Pharmacology, Clinical Pharmacology and Safety Sciences, R&D, AstraZeneca, Gothenburg, Sweden.

Corresponding author: Dave Singh ([dsingh@meu.org.uk](mailto:dsingh@meu.org.uk))

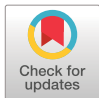

Shareable abstract (@ERSpublications)

[Navafenterol, a novel dual-pharmacology bronchodilator for COPD, improved lung function, reduced COPD symptoms and decreased objective cough counts, to a similar extent to umeclidinium/vilanterol](https://bit.ly/3lV886y) <https://bit.ly/3lV886y>

**Cite this article as:** Singh D, Beier J, Astbury C, *et al.* The novel bronchodilator navafenterol: a phase 2a, multicentre, randomised, double-blind, placebo-controlled crossover trial in COPD. *Eur Respir J* 2022; 59: 2100972 [DOI: 10.1183/13993003.00972-2021].

This single-page version can be shared freely online.

Copyright ©The authors 2022.

This version is distributed under the terms of the Creative Commons Attribution Non-Commercial Licence 4.0. For commercial reproduction rights and permissions contact [permissions@ersnet.org](mailto:permissions@ersnet.org)

Received: 1 April 2021  
Accepted: 8 Aug 2021

## Abstract

**Background** Navafenterol (AZD8871) belongs to a new class of bronchodilator, the single-molecule muscarinic antagonist and  $\beta$ -agonist, developed for the treatment of COPD. This study aimed to evaluate the efficacy, pharmacokinetics and safety of navafenterol *versus* placebo and an active comparator treatment for moderate-to-severe COPD.

**Methods** This phase 2a, randomised, multicentre (Germany and UK), double-blind, double-dummy, three-way complete crossover study (ClinicalTrials.gov identifier: NCT03645434) compared 2 weeks' treatment of once-daily navafenterol 600  $\mu$ g *via* inhalation with placebo and a fixed-dose combination bronchodilator (umeclidinium/vilanterol (UMEC/VI); 62.5  $\mu$ g/25  $\mu$ g) in participants with moderate-to-severe COPD. The primary outcome was change from baseline in trough forced expiratory volume in 1 s (FEV<sub>1</sub>) on day 15. Secondary end-points included change from baseline in peak FEV<sub>1</sub>; change from baseline in Breathlessness, Cough and Sputum Scale (BCSS); change from baseline in COPD Assessment Tool (CAT); adverse events; and pharmacokinetics.

**Results** 73 participants were randomised. After 14 days, trough FEV<sub>1</sub> was significantly improved with navafenterol compared with placebo (least-squares (LS) mean difference 0.202 L;  $p < 0.0001$ ). There was no significant difference in FEV<sub>1</sub> between navafenterol and UMEC/VI (LS mean difference  $-0.046$  L;  $p = 0.075$ ). COPD symptoms (CAT and BCSS) showed significantly greater improvements with both active treatments *versus* placebo (all  $p < 0.005$ ). Novel objective monitoring (VitaloJAK) showed that cough was reduced with both active treatments compared with placebo. Safety profiles were similar across the treatment groups and no serious adverse events were reported in the navafenterol treatment period.

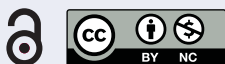

**Conclusion** Once-daily navafenterol was well tolerated, improved lung function and reduced COPD-related symptoms, similar to an established once-daily fixed-dose combination bronchodilator.
